# Supplementary material for: Environmental Complexity and Biodiversity: The Multi-Layered Evolutionary History of a Log-Dwelling Velvet Worm in Montane Temperate Australia
Source: PLoS One. 2013 Dec 17;8(12):e84559. doi: 10.1371/journal.pone.0084559 (PMC3866147; doi:10.1371/journal.pone.0084559)
Supplement: Table S4 — Uncorrected pairwise differences between haplotypes. (XLS) [file pone.0084559.s006.xls]

## Sheet: Table S4
Table S4. Uncorrected pairwise differences between haplotypes. Calculated using MEGA 4.0.
Haplotype 1	Haplotype 2
01	02	03	04	05	06	08	09	10	11	12	13	14	15	16	17	18	19	22	24	25	26	27	28	29	30	31	33	34	35	37	38	39	40	41	42	43	44	45	46	49	50	51	52	54	55	56	57	58	59
02	0.066
03	0.064	0.096
04	0.061	0.016	0.092
05	0.068	0.087	0.064	0.092
06	0.061	0.005	0.092	0.016	0.087
08	0.002	0.068	0.066	0.064	0.071	0.064
09	0.047	0.082	0.054	0.082	0.042	0.078	0.049
10	0.005	0.071	0.068	0.066	0.073	0.066	0.007	0.052
11	0.002	0.068	0.066	0.064	0.071	0.064	0.005	0.049	0.002
12	0.002	0.068	0.061	0.064	0.071	0.064	0.005	0.049	0.007	0.005
13	0.002	0.068	0.061	0.064	0.066	0.064	0.005	0.049	0.007	0.005	0.005
14	0.061	0.056	0.089	0.054	0.099	0.052	0.064	0.08	0.066	0.064	0.059	0.064
15	0.111	0.122	0.125	0.127	0.108	0.125	0.113	0.118	0.115	0.113	0.113	0.108	0.141
16	0.061	0.056	0.089	0.054	0.099	0.052	0.064	0.08	0.066	0.064	0.059	0.064	0.005	0.141
17	0.002	0.068	0.061	0.064	0.066	0.064	0.005	0.049	0.007	0.005	0.005	0.005	0.064	0.108	0.064
18	0.059	0.042	0.087	0.04	0.089	0.038	0.061	0.073	0.064	0.061	0.061	0.061	0.024	0.132	0.019	0.061
19	0.054	0.087	0.049	0.087	0.038	0.082	0.056	0.009	0.059	0.056	0.056	0.052	0.085	0.115	0.085	0.056	0.078
22	0.068	0.049	0.092	0.052	0.092	0.045	0.071	0.078	0.073	0.071	0.071	0.071	0.049	0.132	0.045	0.071	0.031	0.082
24	0.064	0.059	0.092	0.056	0.101	0.054	0.066	0.082	0.068	0.066	0.061	0.066	0.007	0.144	0.002	0.066	0.021	0.087	0.047
25	0.066	0.059	0.089	0.056	0.101	0.054	0.068	0.08	0.071	0.068	0.064	0.068	0.009	0.144	0.005	0.068	0.019	0.085	0.045	0.007
26	0.064	0.094	0.002	0.089	0.064	0.089	0.066	0.056	0.068	0.066	0.061	0.061	0.089	0.125	0.089	0.061	0.089	0.052	0.094	0.092	0.092
27	0.12	0.132	0.134	0.139	0.125	0.134	0.122	0.132	0.125	0.122	0.122	0.118	0.141	0.033	0.136	0.118	0.132	0.129	0.134	0.139	0.139	0.134
28	0.045	0.052	0.073	0.045	0.075	0.047	0.047	0.061	0.049	0.047	0.047	0.047	0.059	0.115	0.056	0.047	0.04	0.068	0.042	0.059	0.056	0.075	0.12
29	0.071	0.052	0.094	0.054	0.094	0.047	0.073	0.08	0.075	0.073	0.073	0.073	0.052	0.134	0.047	0.073	0.033	0.085	0.002	0.049	0.047	0.096	0.136	0.045
30	0.073	0.106	0.068	0.106	0.047	0.101	0.075	0.052	0.078	0.075	0.075	0.071	0.099	0.134	0.099	0.071	0.096	0.042	0.101	0.101	0.099	0.071	0.144	0.082	0.104
31	0.064	0.002	0.094	0.014	0.089	0.002	0.066	0.08	0.068	0.066	0.066	0.066	0.054	0.125	0.054	0.066	0.04	0.085	0.047	0.056	0.056	0.092	0.134	0.049	0.049	0.104
33	0.056	0.082	0.049	0.082	0.054	0.078	0.059	0.052	0.061	0.059	0.054	0.054	0.082	0.12	0.078	0.059	0.075	0.047	0.075	0.08	0.082	0.049	0.129	0.061	0.078	0.066	0.08
34	0.118	0.129	0.132	0.136	0.122	0.132	0.12	0.129	0.122	0.12	0.12	0.115	0.139	0.031	0.134	0.115	0.129	0.127	0.132	0.136	0.136	0.132	0.002	0.118	0.134	0.141	0.132	0.127
35	0.056	0.094	0.059	0.094	0.014	0.089	0.059	0.038	0.061	0.059	0.059	0.054	0.089	0.108	0.089	0.054	0.085	0.033	0.089	0.092	0.092	0.059	0.129	0.078	0.092	0.042	0.092	0.054	0.127
37	0.059	0.04	0.089	0.038	0.089	0.035	0.061	0.075	0.064	0.061	0.061	0.061	0.024	0.132	0.019	0.061	0.002	0.08	0.033	0.021	0.021	0.087	0.132	0.042	0.035	0.099	0.038	0.075	0.129	0.085
38	0.054	0.089	0.021	0.085	0.056	0.085	0.056	0.049	0.059	0.056	0.052	0.052	0.085	0.12	0.085	0.052	0.085	0.045	0.089	0.087	0.087	0.019	0.129	0.071	0.092	0.064	0.087	0.042	0.127	0.052	0.082
39	0.071	0.052	0.089	0.054	0.094	0.047	0.073	0.08	0.075	0.073	0.068	0.073	0.047	0.134	0.042	0.073	0.033	0.085	0.002	0.045	0.042	0.092	0.136	0.045	0.005	0.104	0.049	0.073	0.134	0.092	0.035	0.087
40	0.038	0.085	0.071	0.08	0.08	0.08	0.04	0.064	0.042	0.04	0.04	0.04	0.08	0.127	0.078	0.035	0.075	0.071	0.08	0.08	0.082	0.071	0.134	0.056	0.082	0.08	0.082	0.061	0.132	0.073	0.075	0.056	0.082
41	0.073	0.104	0.078	0.099	0.087	0.099	0.075	0.078	0.078	0.075	0.075	0.071	0.101	0.141	0.104	0.071	0.092	0.078	0.099	0.106	0.104	0.08	0.148	0.078	0.101	0.089	0.101	0.078	0.146	0.085	0.094	0.075	0.101	0.075
42	0.066	0.101	0.066	0.101	0.038	0.096	0.068	0.038	0.071	0.068	0.068	0.064	0.094	0.115	0.094	0.064	0.094	0.028	0.096	0.096	0.099	0.066	0.134	0.085	0.099	0.045	0.099	0.054	0.132	0.033	0.094	0.054	0.099	0.078	0.089
43	0.078	0.101	0.064	0.104	0.049	0.096	0.08	0.047	0.082	0.08	0.08	0.075	0.108	0.125	0.106	0.075	0.096	0.038	0.096	0.108	0.108	0.061	0.136	0.085	0.099	0.056	0.099	0.061	0.134	0.045	0.094	0.064	0.099	0.085	0.089	0.042
44	0.056	0.016	0.087	0.014	0.087	0.016	0.059	0.078	0.061	0.059	0.059	0.059	0.052	0.12	0.052	0.059	0.038	0.082	0.049	0.054	0.054	0.085	0.127	0.047	0.052	0.101	0.014	0.078	0.125	0.089	0.035	0.08	0.052	0.075	0.094	0.096	0.099
45	0.054	0.092	0.082	0.087	0.089	0.087	0.056	0.075	0.059	0.056	0.052	0.056	0.085	0.132	0.085	0.052	0.085	0.08	0.085	0.087	0.087	0.082	0.139	0.064	0.087	0.089	0.089	0.08	0.136	0.082	0.085	0.068	0.082	0.026	0.087	0.089	0.099	0.082
46	0.061	0.04	0.087	0.038	0.087	0.035	0.064	0.073	0.066	0.064	0.064	0.064	0.031	0.129	0.026	0.064	0.014	0.078	0.024	0.028	0.028	0.085	0.129	0.038	0.026	0.096	0.038	0.073	0.127	0.085	0.012	0.08	0.026	0.073	0.094	0.092	0.092	0.035	0.078
49	0.061	0.045	0.089	0.042	0.089	0.04	0.064	0.075	0.066	0.064	0.064	0.064	0.026	0.132	0.021	0.064	0.002	0.08	0.028	0.024	0.021	0.092	0.132	0.042	0.031	0.099	0.042	0.078	0.129	0.085	0.005	0.087	0.031	0.078	0.094	0.096	0.099	0.04	0.087	0.016
50	0.061	0.045	0.087	0.042	0.092	0.04	0.064	0.075	0.066	0.064	0.064	0.064	0.024	0.134	0.019	0.064	0.002	0.08	0.033	0.021	0.019	0.089	0.134	0.042	0.035	0.099	0.042	0.078	0.132	0.087	0.005	0.087	0.035	0.078	0.094	0.096	0.099	0.04	0.087	0.016	0.005
51	0.061	0.094	0.056	0.094	0.035	0.089	0.064	0.04	0.066	0.064	0.064	0.059	0.087	0.122	0.087	0.059	0.085	0.033	0.089	0.089	0.087	0.059	0.132	0.071	0.092	0.014	0.092	0.054	0.129	0.031	0.087	0.052	0.092	0.073	0.082	0.035	0.047	0.089	0.08	0.085	0.087	0.087
52	0.002	0.068	0.066	0.064	0.071	0.064	0.005	0.049	0.007	0.005	0.005	0.005	0.064	0.113	0.064	0.005	0.061	0.056	0.071	0.066	0.068	0.066	0.122	0.047	0.073	0.075	0.066	0.059	0.12	0.059	0.061	0.056	0.073	0.04	0.071	0.068	0.08	0.059	0.056	0.064	0.064	0.064	0.064
54	0.12	0.132	0.134	0.139	0.125	0.134	0.122	0.132	0.125	0.122	0.122	0.118	0.141	0.033	0.136	0.118	0.132	0.129	0.134	0.139	0.139	0.134	0.005	0.12	0.136	0.144	0.134	0.129	0.002	0.129	0.132	0.129	0.136	0.134	0.148	0.134	0.136	0.127	0.139	0.129	0.132	0.134	0.132	0.122
55	0.047	0.049	0.075	0.042	0.073	0.045	0.049	0.064	0.052	0.049	0.049	0.049	0.061	0.118	0.059	0.049	0.042	0.071	0.045	0.061	0.059	0.078	0.122	0.002	0.047	0.085	0.047	0.064	0.12	0.08	0.045	0.073	0.047	0.059	0.08	0.087	0.087	0.045	0.066	0.04	0.045	0.045	0.073	0.049	0.122
56	0.047	0.049	0.075	0.047	0.078	0.045	0.049	0.064	0.052	0.049	0.049	0.049	0.061	0.118	0.059	0.049	0.042	0.071	0.045	0.061	0.059	0.078	0.12	0.002	0.047	0.085	0.047	0.064	0.118	0.08	0.045	0.073	0.047	0.059	0.08	0.087	0.085	0.049	0.066	0.04	0.045	0.045	0.073	0.049	0.12	0.005
57	0.047	0.054	0.075	0.047	0.073	0.049	0.049	0.059	0.052	0.049	0.049	0.049	0.061	0.115	0.059	0.049	0.042	0.066	0.045	0.061	0.059	0.078	0.12	0.002	0.047	0.08	0.052	0.064	0.118	0.075	0.045	0.073	0.047	0.059	0.08	0.082	0.082	0.049	0.066	0.04	0.045	0.045	0.068	0.049	0.12	0.005	0.005
58	0.026	0.059	0.068	0.054	0.066	0.054	0.028	0.045	0.031	0.028	0.028	0.028	0.059	0.113	0.059	0.028	0.054	0.054	0.059	0.061	0.061	0.068	0.122	0.04	0.061	0.068	0.056	0.059	0.12	0.059	0.054	0.059	0.061	0.045	0.075	0.068	0.078	0.054	0.054	0.052	0.056	0.056	0.056	0.028	0.122	0.042	0.042	0.042
59	0.042	0.075	0.064	0.071	0.066	0.071	0.045	0.059	0.047	0.045	0.04	0.045	0.075	0.113	0.073	0.04	0.068	0.064	0.073	0.075	0.075	0.064	0.12	0.054	0.075	0.078	0.073	0.059	0.118	0.064	0.068	0.059	0.071	0.049	0.071	0.073	0.073	0.066	0.061	0.066	0.071	0.071	0.066	0.045	0.12	0.056	0.056	0.052	0.038
60	0.056	0.073	0.075	0.071	0.08	0.068	0.059	0.061	0.061	0.059	0.059	0.059	0.082	0.115	0.08	0.059	0.071	0.068	0.068	0.082	0.082	0.073	0.129	0.047	0.071	0.087	0.071	0.052	0.127	0.078	0.068	0.068	0.071	0.059	0.094	0.082	0.08	0.068	0.08	0.066	0.073	0.073	0.075	0.059	0.129	0.049	0.049	0.049	0.052
61	0.031	0.059	0.068	0.052	0.064	0.054	0.033	0.052	0.035	0.033	0.033	0.033	0.064	0.115	0.064	0.033	0.052	0.059	0.054	0.066	0.068	0.068	0.122	0.014	0.056	0.073	0.056	0.054	0.12	0.066	0.052	0.064	0.056	0.052	0.078	0.071	0.078	0.054	0.064	0.047	0.054	0.054	0.061	0.033	0.122	0.016	0.016	0.016	0.035
62	0.049	0.056	0.073	0.049	0.08	0.052	0.052	0.066	0.054	0.052	0.052	0.052	0.064	0.12	0.061	0.052	0.045	0.073	0.047	0.064	0.061	0.075	0.125	0.005	0.049	0.087	0.054	0.066	0.122	0.082	0.047	0.071	0.049	0.061	0.082	0.089	0.089	0.052	0.068	0.042	0.047	0.047	0.075	0.052	0.125	0.007	0.007	0.007	0.045
63	0.047	0.054	0.075	0.047	0.078	0.049	0.049	0.064	0.052	0.049	0.049	0.049	0.061	0.118	0.059	0.049	0.042	0.071	0.045	0.061	0.059	0.078	0.122	0.002	0.047	0.085	0.052	0.064	0.12	0.08	0.045	0.073	0.047	0.059	0.08	0.082	0.087	0.049	0.066	0.04	0.045	0.045	0.073	0.049	0.122	0.005	0.005	0.005	0.042
64	0.047	0.054	0.075	0.047	0.078	0.049	0.049	0.064	0.052	0.049	0.049	0.049	0.061	0.115	0.059	0.049	0.042	0.071	0.045	0.061	0.059	0.078	0.12	0.002	0.047	0.085	0.052	0.064	0.118	0.08	0.045	0.073	0.047	0.059	0.08	0.087	0.087	0.045	0.066	0.04	0.045	0.045	0.073	0.049	0.12	0.005	0.005	0.005	0.042
65	0.047	0.054	0.071	0.047	0.078	0.049	0.049	0.064	0.052	0.049	0.049	0.049	0.061	0.118	0.059	0.049	0.042	0.071	0.045	0.061	0.059	0.073	0.122	0.002	0.047	0.085	0.052	0.064	0.12	0.08	0.045	0.068	0.047	0.059	0.08	0.087	0.087	0.049	0.066	0.04	0.045	0.045	0.073	0.049	0.122	0.005	0.005	0.005	0.042
66	0.115	0.127	0.129	0.134	0.12	0.129	0.118	0.127	0.12	0.118	0.118	0.113	0.136	0.033	0.132	0.113	0.127	0.125	0.129	0.134	0.134	0.129	0.005	0.115	0.132	0.139	0.129	0.125	0.002	0.125	0.127	0.125	0.132	0.129	0.148	0.129	0.132	0.122	0.134	0.125	0.127	0.129	0.127	0.118	0.005	0.118	0.115	0.115	0.118
67	0.056	0.045	0.082	0.042	0.082	0.04	0.059	0.068	0.061	0.059	0.059	0.059	0.035	0.125	0.031	0.059	0.019	0.073	0.028	0.033	0.033	0.08	0.125	0.033	0.031	0.092	0.042	0.068	0.122	0.08	0.016	0.075	0.031	0.068	0.089	0.087	0.087	0.04	0.073	0.005	0.021	0.021	0.08	0.059	0.125	0.035	0.035	0.035	0.047
68	0.118	0.129	0.132	0.136	0.122	0.132	0.12	0.129	0.122	0.12	0.12	0.115	0.139	0.031	0.134	0.115	0.129	0.127	0.132	0.136	0.136	0.132	0.002	0.118	0.134	0.141	0.132	0.127	0	0.127	0.129	0.127	0.134	0.132	0.146	0.132	0.134	0.125	0.136	0.127	0.129	0.132	0.129	0.12	0.002	0.12	0.118	0.118	0.12
69	0.002	0.064	0.061	0.059	0.066	0.059	0.005	0.045	0.007	0.005	0.005	0.005	0.059	0.111	0.059	0.005	0.056	0.052	0.066	0.061	0.064	0.061	0.12	0.042	0.068	0.071	0.061	0.054	0.118	0.054	0.056	0.052	0.068	0.038	0.073	0.064	0.075	0.054	0.054	0.059	0.059	0.059	0.059	0.005	0.12	0.045	0.045	0.045	0.026
70	0.054	0.071	0.073	0.068	0.078	0.066	0.056	0.059	0.059	0.056	0.056	0.056	0.08	0.113	0.078	0.056	0.068	0.066	0.066	0.08	0.08	0.071	0.127	0.045	0.068	0.085	0.068	0.049	0.125	0.075	0.066	0.066	0.068	0.056	0.092	0.08	0.078	0.066	0.078	0.064	0.071	0.071	0.073	0.056	0.127	0.047	0.047	0.047	0.049
71	0.078	0.071	0.101	0.068	0.104	0.066	0.08	0.089	0.082	0.08	0.08	0.08	0.028	0.155	0.024	0.08	0.033	0.094	0.056	0.026	0.024	0.104	0.148	0.066	0.059	0.104	0.068	0.089	0.146	0.096	0.035	0.099	0.059	0.094	0.111	0.104	0.111	0.066	0.104	0.042	0.035	0.033	0.092	0.08	0.148	0.068	0.068	0.068	0.073
72	0.061	0.094	0.002	0.089	0.061	0.089	0.064	0.052	0.066	0.064	0.059	0.059	0.087	0.122	0.087	0.059	0.085	0.047	0.089	0.089	0.087	0.005	0.132	0.071	0.092	0.066	0.092	0.047	0.129	0.056	0.087	0.019	0.087	0.068	0.075	0.064	0.061	0.085	0.08	0.085	0.087	0.085	0.054	0.064	0.132	0.073	0.073	0.073	0.066
73	0.066	0.094	0.054	0.094	0.038	0.089	0.068	0.035	0.071	0.068	0.068	0.064	0.092	0.113	0.089	0.064	0.078	0.026	0.082	0.092	0.089	0.056	0.129	0.071	0.085	0.042	0.092	0.049	0.127	0.033	0.08	0.059	0.085	0.073	0.08	0.031	0.019	0.089	0.089	0.078	0.08	0.08	0.033	0.068	0.129	0.073	0.073	0.068	0.066
74	0.064	0.082	0.059	0.087	0.005	0.082	0.066	0.042	0.068	0.066	0.066	0.061	0.094	0.106	0.094	0.061	0.085	0.038	0.087	0.096	0.096	0.059	0.127	0.075	0.089	0.047	0.085	0.049	0.125	0.014	0.085	0.052	0.089	0.075	0.082	0.038	0.049	0.082	0.085	0.082	0.085	0.087	0.035	0.066	0.127	0.073	0.078	0.073	0.061
75	0.061	0.016	0.092	0.005	0.092	0.016	0.064	0.082	0.066	0.064	0.064	0.064	0.054	0.122	0.054	0.064	0.04	0.087	0.052	0.056	0.056	0.089	0.134	0.045	0.054	0.106	0.014	0.082	0.132	0.094	0.038	0.085	0.054	0.08	0.094	0.101	0.104	0.014	0.087	0.038	0.042	0.042	0.094	0.064	0.134	0.042	0.047	0.047	0.054
[truncated: 16 more columns]
